# Supplementary material for: Up-regulation of MELK by E2F1 promotes the proliferation in cervical cancer cells
Source: Int J Biol Sci. 2021 Sep 7;17(14):3875–88. doi: 10.7150/ijbs.62517 (PMC8495384; doi:10.7150/ijbs.62517)

**Figure S1**

**A** Expression of MELK in CESC based on patient's race from TCGA-CESE project.

**B** Expression of MELK in CESC based on patient's weight from TCGA-CESE project.

**C** Expression of MELK in CESC based on patient's age (years) from TCGA-CESE project.

**D** Bioinformatics analysis indicates that E2F1 is likely to be the upstream transcription factor of MELK in cervical cancer. E2F1 peaks at the promoter of MELK (chr9:36,569,218-36,579,655).

**Figure S2**

**A** Viability of C33A cells 24 hours posttreatment with MELK-8A. Cell viability in a dose-dependent manner 24 hours posttreatment. DMSO was used as a control.

**B** Effect of MELK kinase activity on proliferation after 5 $\mu$ M MELK-8A inhibition. The cell viability of SiHa and C33A cells treated with MELK-8A was measured every 24 hours for 72 hours using the CCK8 cell proliferation assay kit. \*  $P < 0.05$ , \*\*  $P < 0.01$ , \*\*\*  $P < 0.001$  and \*\*\*\*  $P < 0.0001$  compared to control.

Figure S1

A

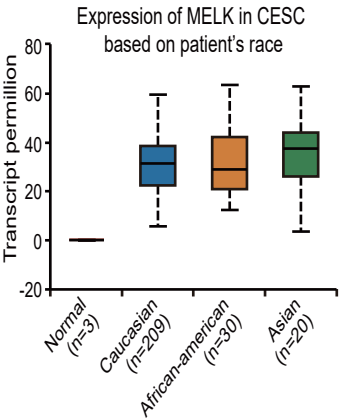

B

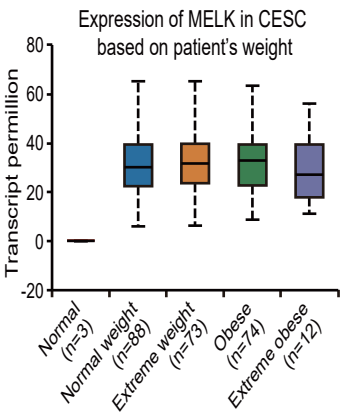

C

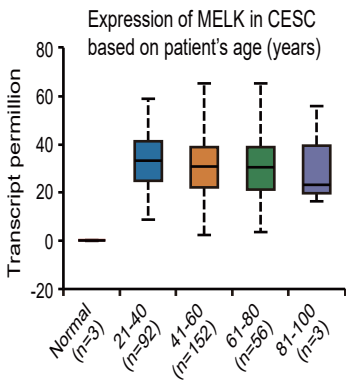

D

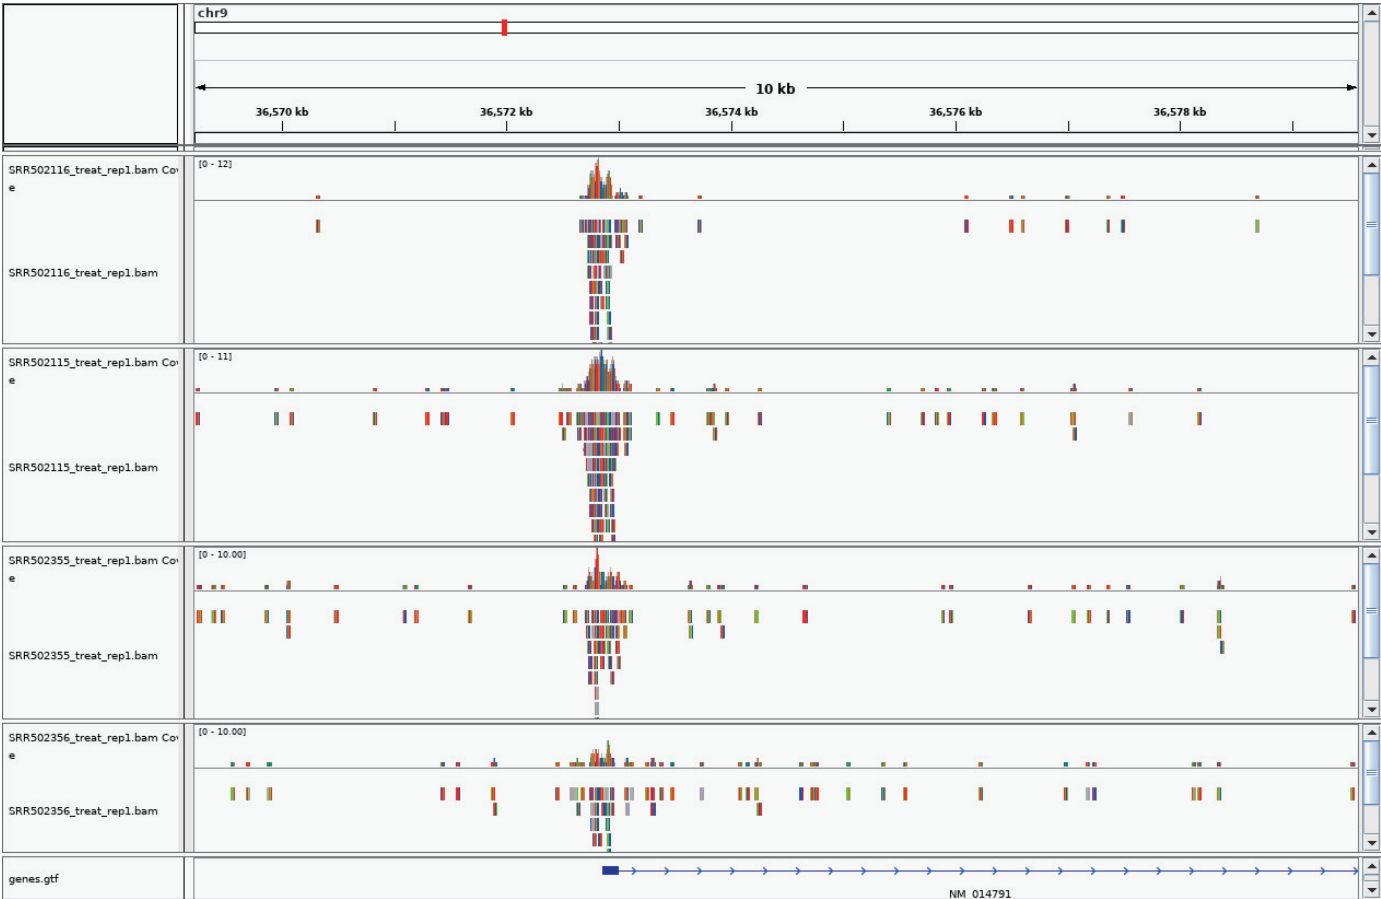

Figure S2

A

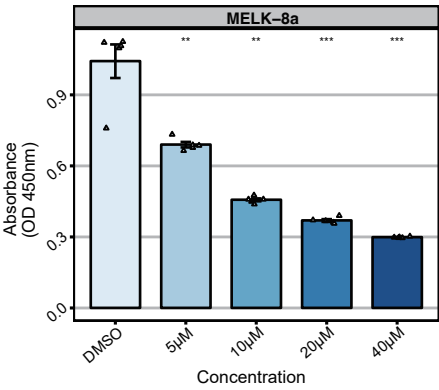

C

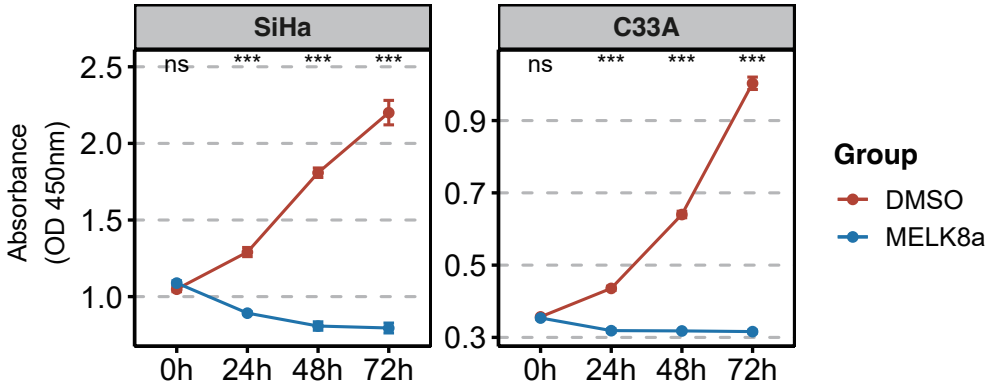

Supplement: Supplementary file 1 — Supplementary figures. [file ijbsv17p3875s1.pdf]
